# Supplementary material
Source: PubMed Central journal article supplement (PMC3203703)
Supplement: cr201151x1.pdf [file cr201151x1.pdf]

# Figure S1

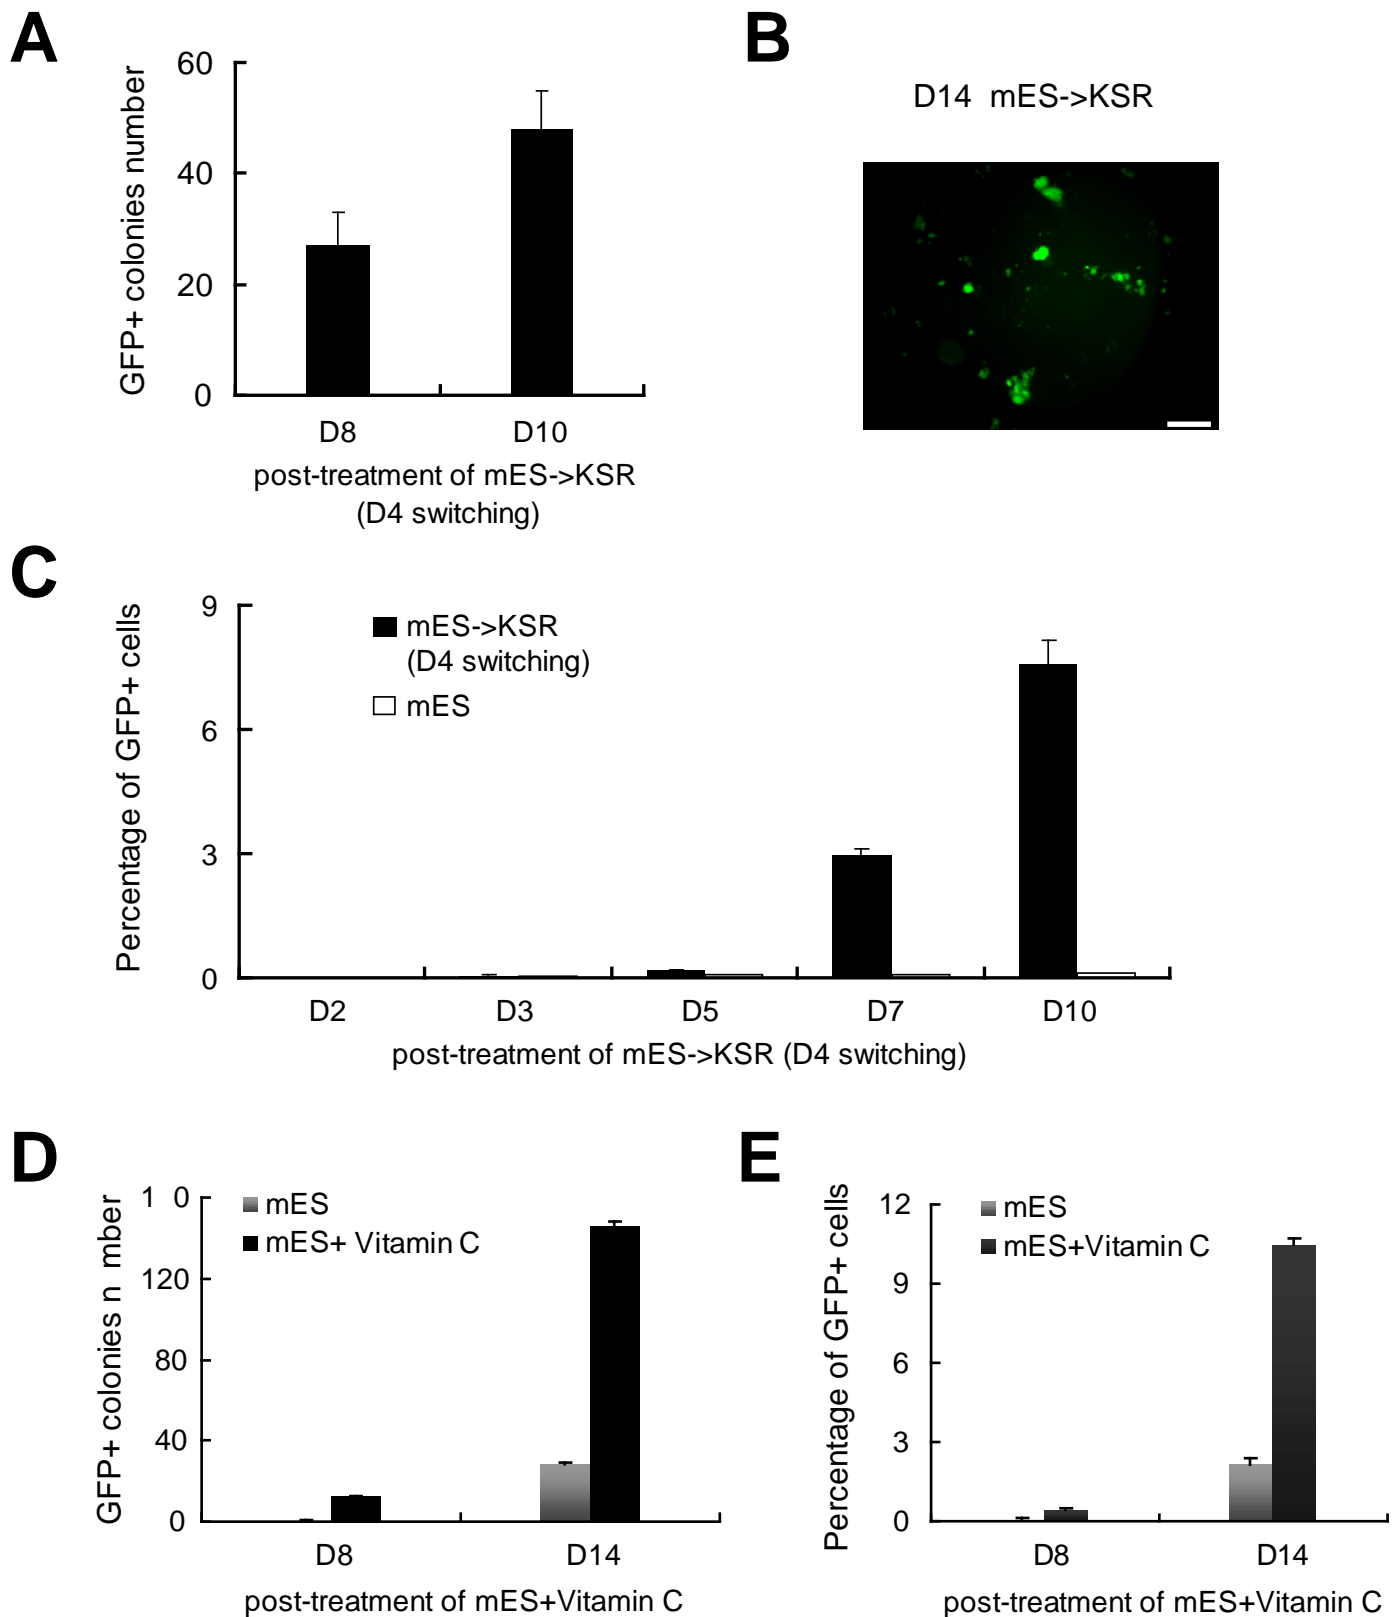

Figure S1. The effect of reported protocols for generation of iPSCs. (A) The strategy of switching mES to KSR at day 4 promotes OKS-mediated reprogramming. The GFP positive colonies from 20,000 MEFs were scored at day 8 and day 10 post-treatment.  $n=2$ , error bars indicated s.d. (B) Representative photo shows the reprogramming efficiency of the mES->KSR strategy at day 14 post-treatment. Scale bar, 1mm. (C) MEFs infected with OKS were cultured with the mES->KSR strategy and analyzed by FACS at day 2, 3, 5, 7 and 10. The percentage of GFP positive cells was scored and shown.  $n=2$ , error bars indicated s.d. (D) Vitamin C promotes reprogramming when supplemented into mES medium. 20,000 MEFs infected with OKS were cultured in mES or mES supplemented with vitamin C. Oct4-GFP positive colonies were counted at day 8 and day14 post-treatment respectively. (E) OKS-mediated reprogramming is improved by vitamin C. The percentage of GFP positive cells was analyzed at day 8 and day 14 post-treatment respectively.
