# Supplementary material
Source: PubMed Central journal article supplement (PMC3203703)
Supplement: cr201151x2.pdf [file cr201151x2.pdf]

# Figure S2

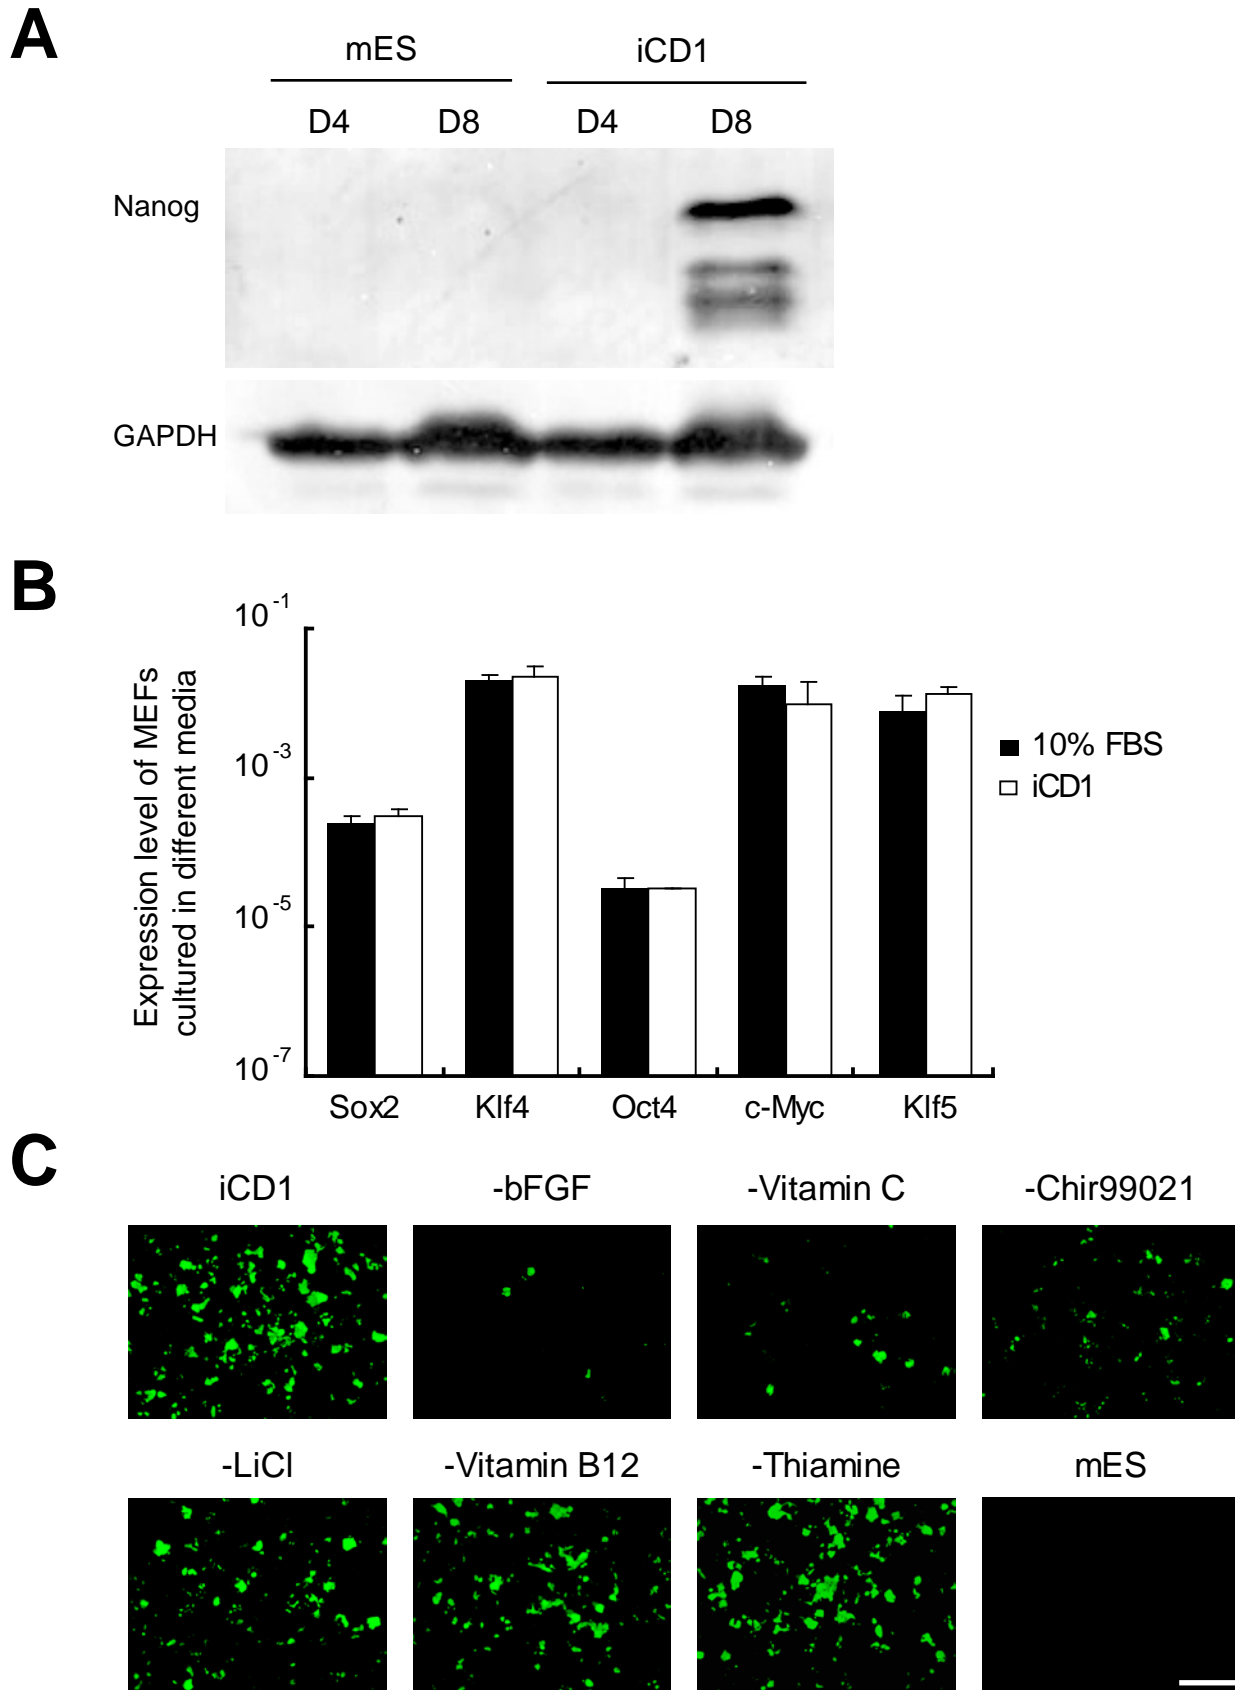

Figure S2. Efficient reprogramming in iCD1. (A) MEFs infected by OSK expressed Nanog at day 8 post-treatment in iCD1. (B) iCD1 do not activated endogenous expression of reprogramming factors. Expression of indicated genes were detected by qRT-PCR in MEFs cultured in either normal 10% FBS medium or iCD1 for 72 hr. (C) Representative images of the cultures described in Figure 1D showed the reprogramming efficiency. Scale bar, 2mm.
