# Supplementary material
Source: PubMed Central journal article supplement (PMC3203703)
Supplement: cr201151x3.pdf [file cr201151x3.pdf]

# Figure S3

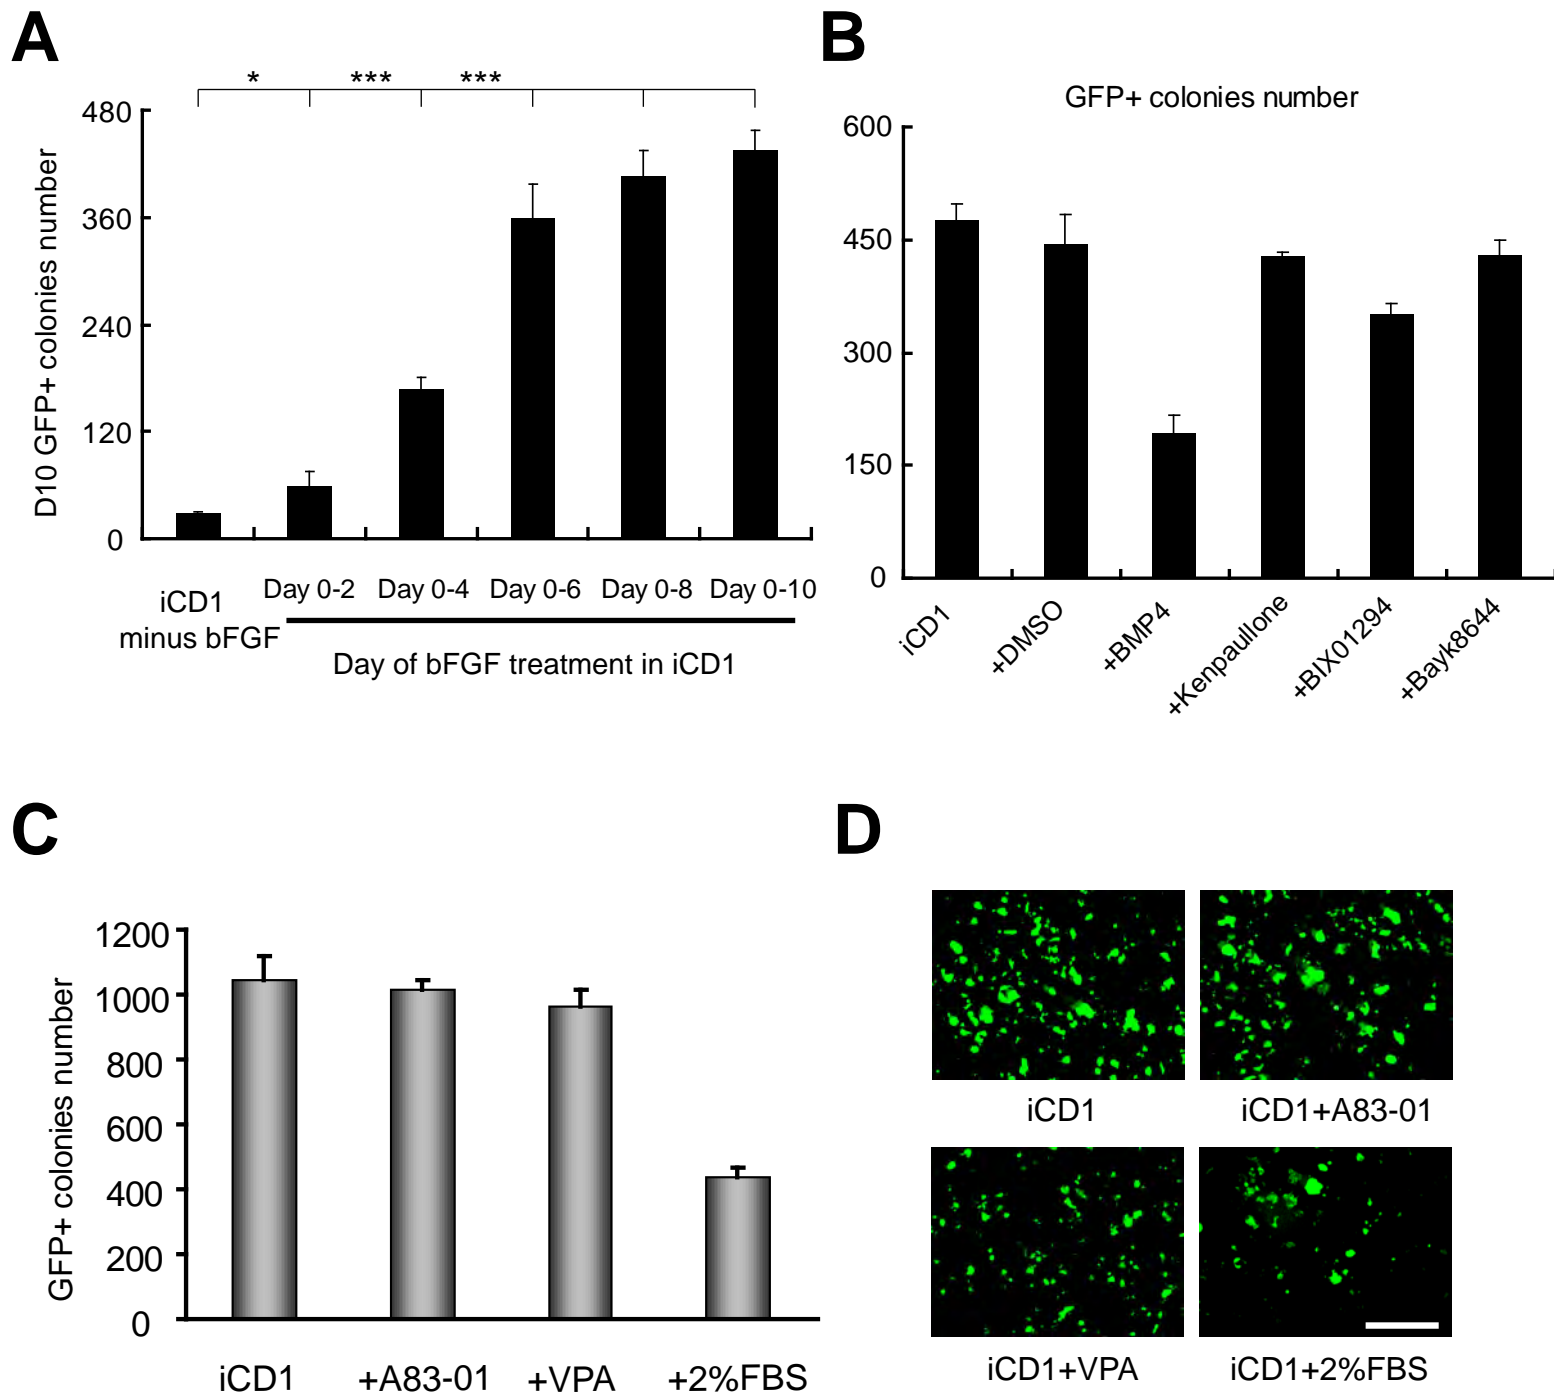

Figure S3. iCD1 is optimized for OKS mediated somatic reprogramming. (A) MEFs infected with OKS were cultured in iCD1 with different bFGF windows. Oct4-GFP colonies were scored at day 10 and shown.  $n=4$ , error bars indicated s.d.  $*p<0.05$  and  $***p<0.001$ . (B) BMP4, Kenpaullone, BIX01294 and Bayk8644 could not further promote OKS-mediated reprogramming in iCD1. Oct4-GFP colonies were scored at day 10 post-treatment and shown.  $n=3$ . (C) Known compounds which improve reprogramming, including ALK5 inhibitor A83-01, HDAC inhibitor VPA, and FBS which used in traditional mES medium, cannot enhance the OKS mediated reprogramming in iCD1. MEFs infected with OKS were cultured in iCD1 and iCD1 supplemented with A83-01 (0.5 $\mu$ M), VPA(1mM) and 2% FBS.  $n=3$ . (D) Representative photos of the GFP+ colonies emerged in experiments described in (C). Scale bar, 2mm.
