# Supplementary material
Source: PubMed Central journal article supplement (PMC3203703)
Supplement: cr201151x4.pdf [file cr201151x4.pdf]

# Figure S4

## A

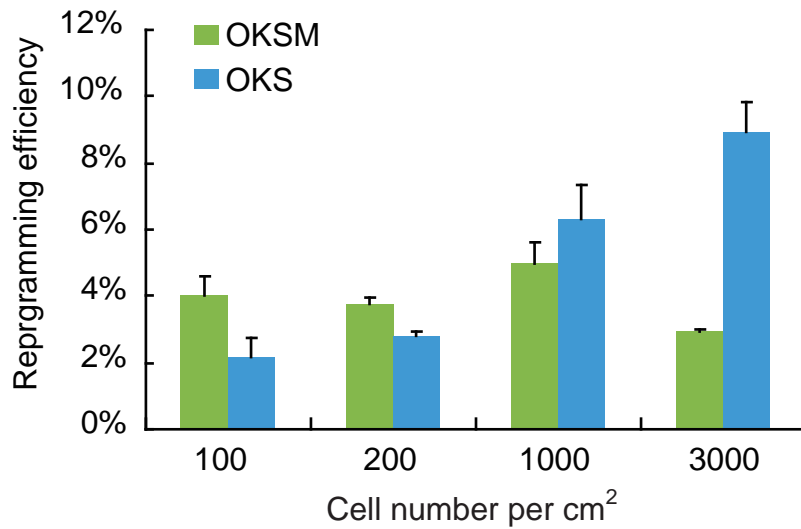

## B

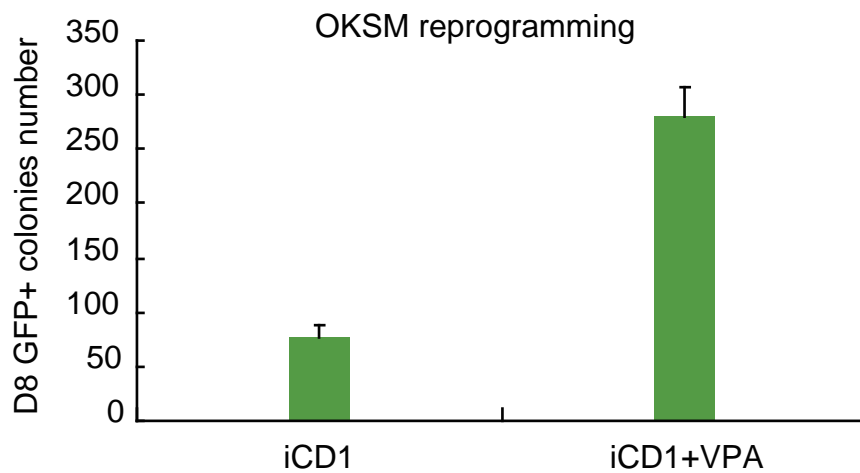

## C

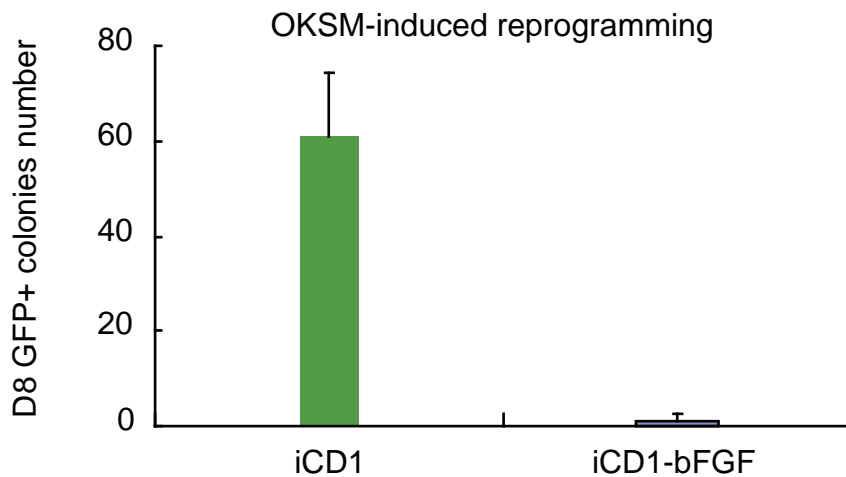

Figure S4. iCD1 is optimized for OKS mediated somatic reprogramming. (A) MEFs infected with OKS or OKSM were cultured in iCD1 with different starting cell density. Oct4-GFP colonies were scored at day 8 and shown. n=2. (B) VPA improve OKSM-mediated reprogramming in iCD1. n=3. (C) bFGF is critical for OKSM-mediated reprogramming. n=3. All error bars indicated s.d.
