# Supplementary material
Source: PubMed Central journal article supplement (PMC3203703)
Supplement: cr201151x5.pdf [file cr201151x5.pdf]

# Figure S5

## A

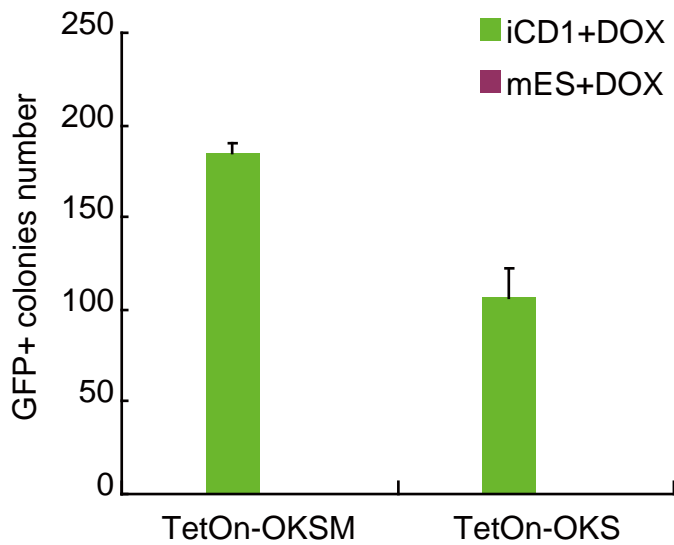

## B

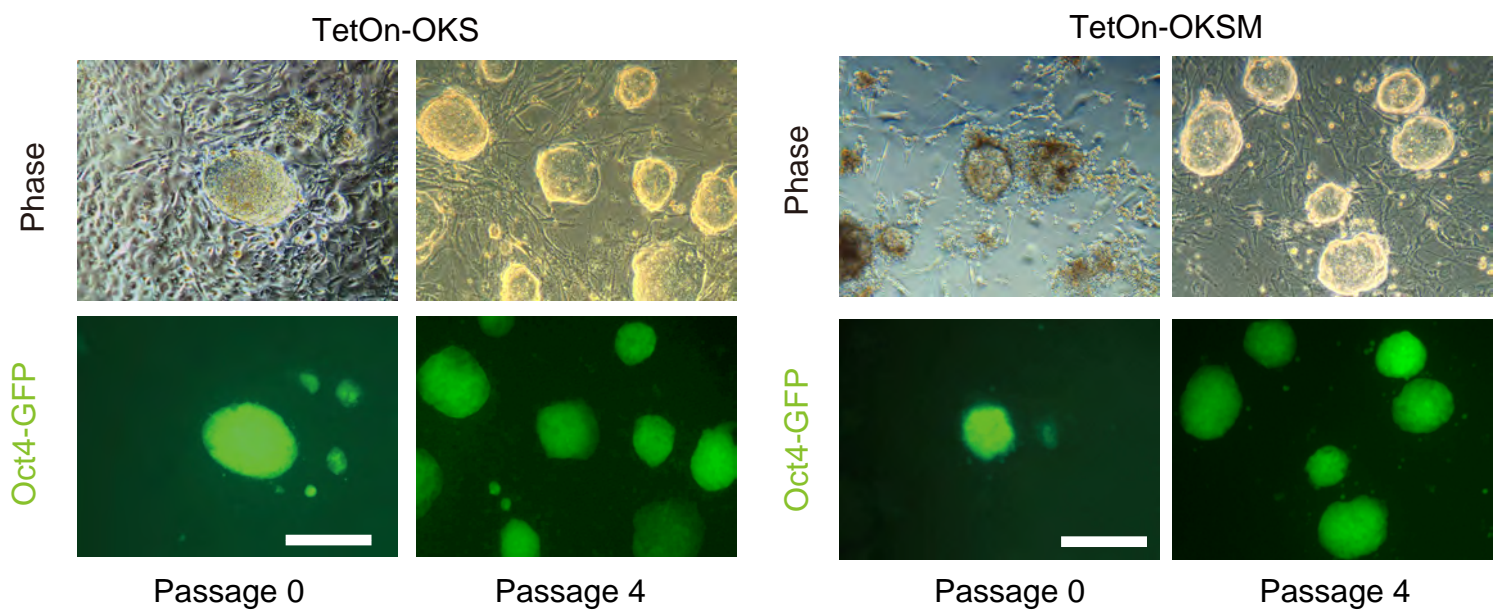

Figure S5. Application of iCD1 on inducible system based on lentivirus. (A) MEFs infected with OKSM or OKS lentivirus constructed with TetOn-inducible system were cultured in iCD1 or mES supplemented with dox. GFP+ colonies were scored at day 8 post-treatment. n=3. (B) Representative photos show the morphology of primary iPSC colonies (P0) and passage colonies (P4) induced by TetOn-OKSM or TetOn-OKS. Scale bars, 250 $\mu$ m.
