# Supplementary material
Source: PubMed Central journal article supplement (PMC3203703)
Supplement: cr201151x6.pdf [file cr201151x6.pdf]

# Figure S6

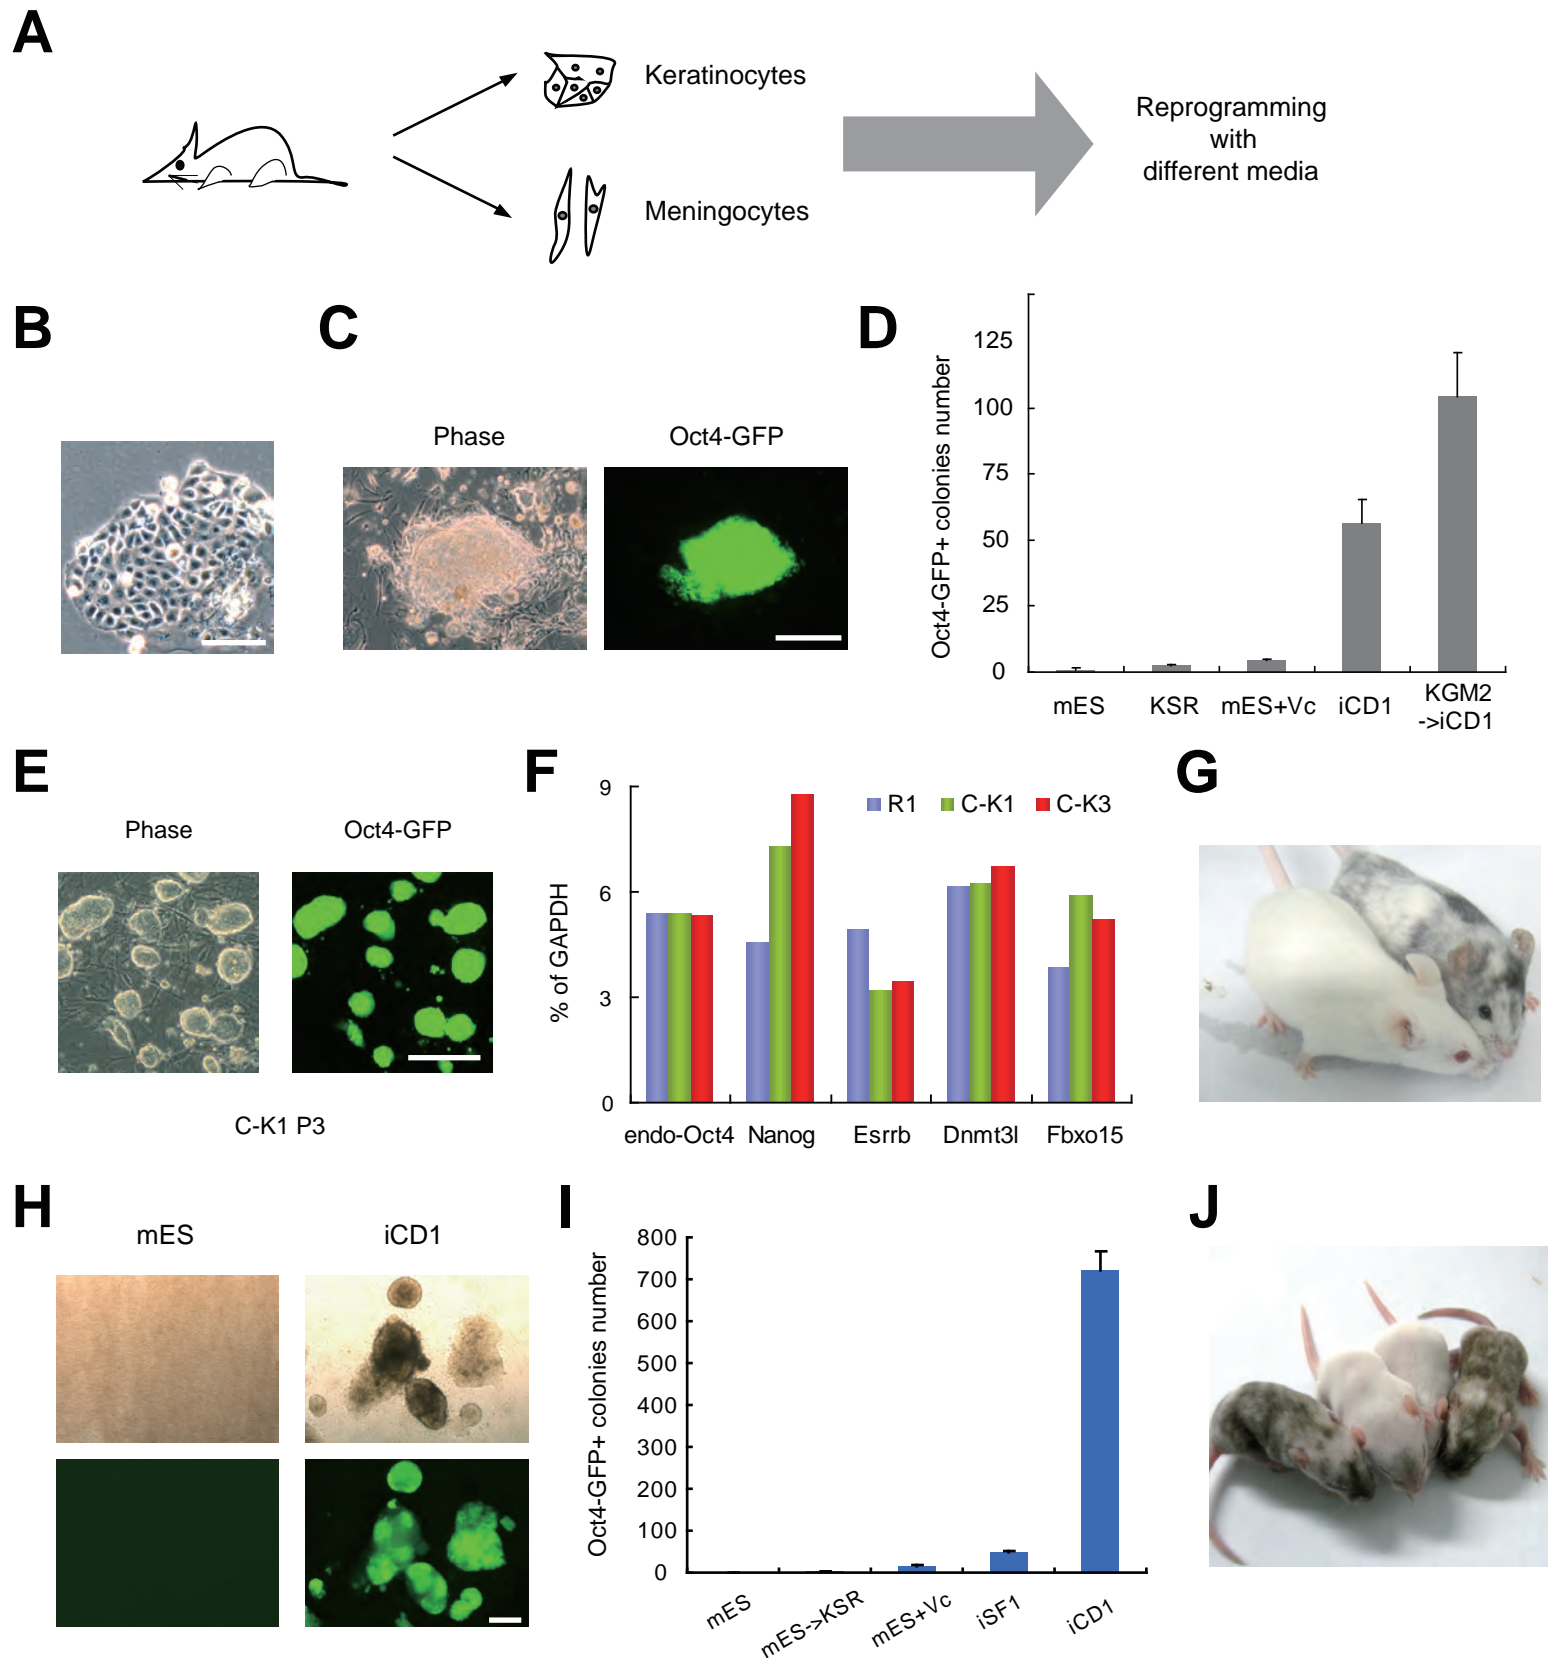

Figure S6. iCD1 supports efficient reprogramming in other cell types. (A) Keratinocytes and meningocytes were isolated for reprogramming in different media. (B) Morphology of mouse keratinocytes before infection. Scale bar, 100µm. (C) Primary iPSC colony derived from keratinocytes. Scale bar, 250µm. (D) Reprogramming efficiency of OKS-infected keratinocytes with indicated media. “KGM2->iCD1” indicated the culture strategy of switching KGM2 to iCD1 at day 2 post-treatment. n=3. (E-G) Morphology, Oct4-GFP expression, pluripotent markers expression and contribution to chimeric mice (black eye) of iPSC lines which derived from keratinocytes. Scale bar, 250µm. (H) Representative photos of primary colonies of iPSCs derived from meningocytes. Scale bar, 250µm. (I) Reprogramming efficiency of OKS-infected meningocytes with indicated media. n=3. (J) Chimeric mouse generated from iPSCs of OSK-infected meningocytes cultured in iCD1.
