# Supplementary material
Source: PubMed Central journal article supplement (PMC3203703)
Supplement: cr201151x7.pdf [file cr201151x7.pdf]

# Figure S7

**A**

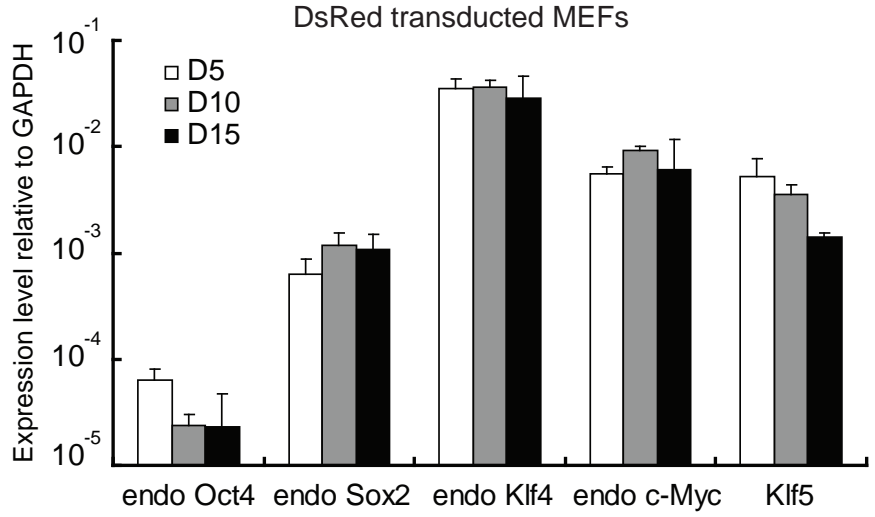

**B**

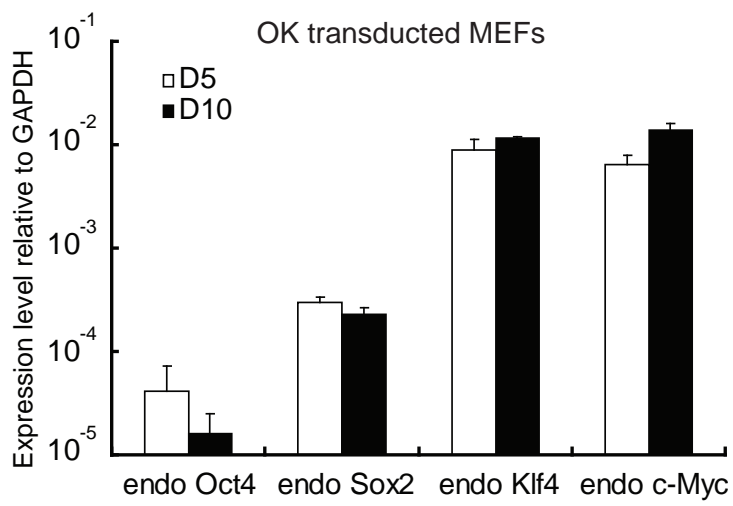

**C**

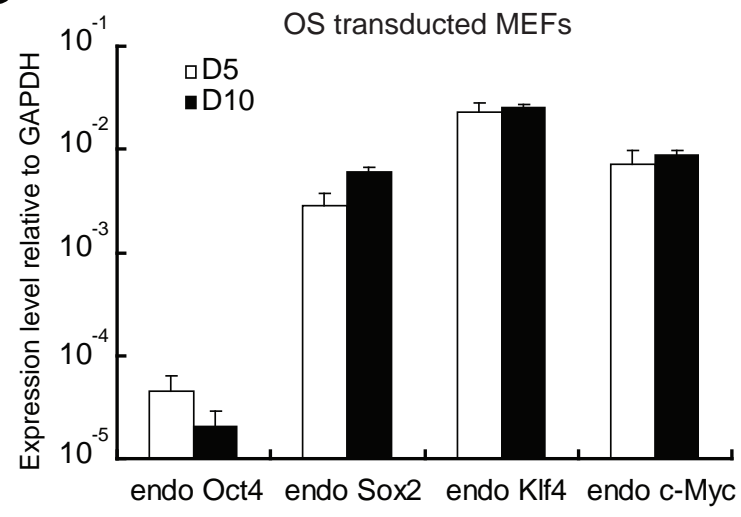

**D**

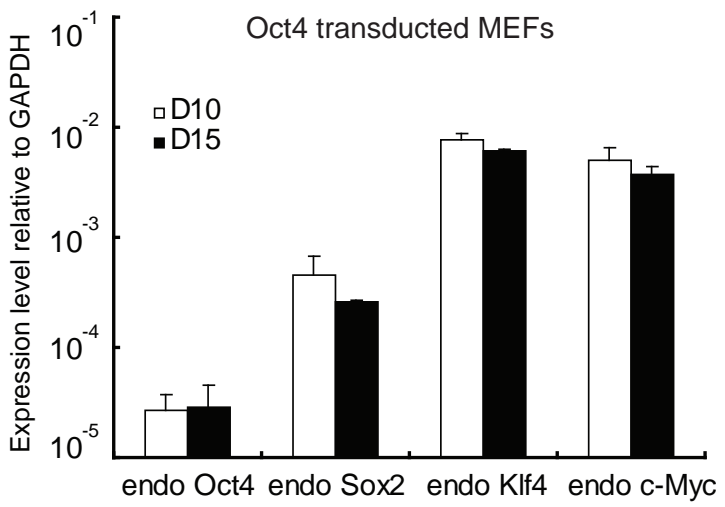

Figure S7. Effect of iCD1 on reprogramming factor expression. (A-D) Time course expression analysis of endogenous reprogramming factors by qRT-PCR with DsRed/OK/OS/Oct4 transduced MEFs in iCD1 n=3, error bars indicated s.d.
